# Supplementary material for: Associations between Adherence to the Taiwan Dietary Reference Intakes of Micronutrients and the Risk of Type 2 Diabetes
Source: Int J Environ Res Public Health. 2022 Sep 27;19(19):12242. doi: 10.3390/ijerph191912242 (PMC9566350; doi:10.3390/ijerph191912242)
Supplement: Supplementary file 1 [file ijerph-19-12242-s001.zip › ijerph-1897994-supplementary.pdf]

**Table S1. Taiwan Dietary Reference Intakes of selected micronutrients**

| <b>Nutrients</b> | <b>Dietary Reference Intakes</b>                                                                                                                             | <b>Reference</b> |
|------------------|--------------------------------------------------------------------------------------------------------------------------------------------------------------|------------------|
| Vitamin A        | Aged 19 and above: 600 µg RE for men, 500 µg RE for women.                                                                                                   | RDA              |
| Vitamin C        | Aged 19 and above: 100 mg.                                                                                                                                   | RDA              |
| Vitamin D        | Aged 19 to 50: 10 µg;<br>Aged 51 and above: 15 µg.                                                                                                           | AI               |
| Vitamin E        | Aged 19 and above: 12 mg α-TE.                                                                                                                               | AI               |
| Vitamin B1       | Aged 19 and above: 1.2 mg for men, 0.9 mg for women.                                                                                                         | RDA              |
| Vitamin B2       | Aged 19 and above: 1.3 mg for men, 1.0 mg for women.                                                                                                         | RDA              |
| Vitamin B3       | Aged 19 and above: 16 mg NE for men, 14 mg NE for women.                                                                                                     | RDA              |
| Vitamin B6       | Aged 19 to 50: 1.5 mg;<br>Aged 51 and above: 1.6 mg.                                                                                                         | RDA              |
| Vitamin B12      | Aged 19 and above: 2.4 µg.                                                                                                                                   | RDA              |
| Iron             | Aged 19 to 50: 10 mg for men, 15 mg for women;<br>Aged 51 and above: 10 mg.                                                                                  | RDA              |
| Magnesium        | Aged 19 to 50: 380 mg for men, 320 mg for women;<br>Aged 51 to 70: 360 mg for men, 310 mg for women;<br>Aged 71 and above: 350 mg for men, 300 mg for women. | RDA              |
| Zinc             | Aged 19 and above: 15 mg for men, 12 mg for women.                                                                                                           | AI               |
| Calcium          | Aged 19 and above: 1000 mg.                                                                                                                                  | AI               |
| Phosphorus       | Aged 19 and above: 800 mg.                                                                                                                                   | AI               |

RE: retinol equivalent; α-TE: α-tocopherol equivalent; NE: niacin equivalent; RDA: recommended dietary allowance; AI: adequate intakes.

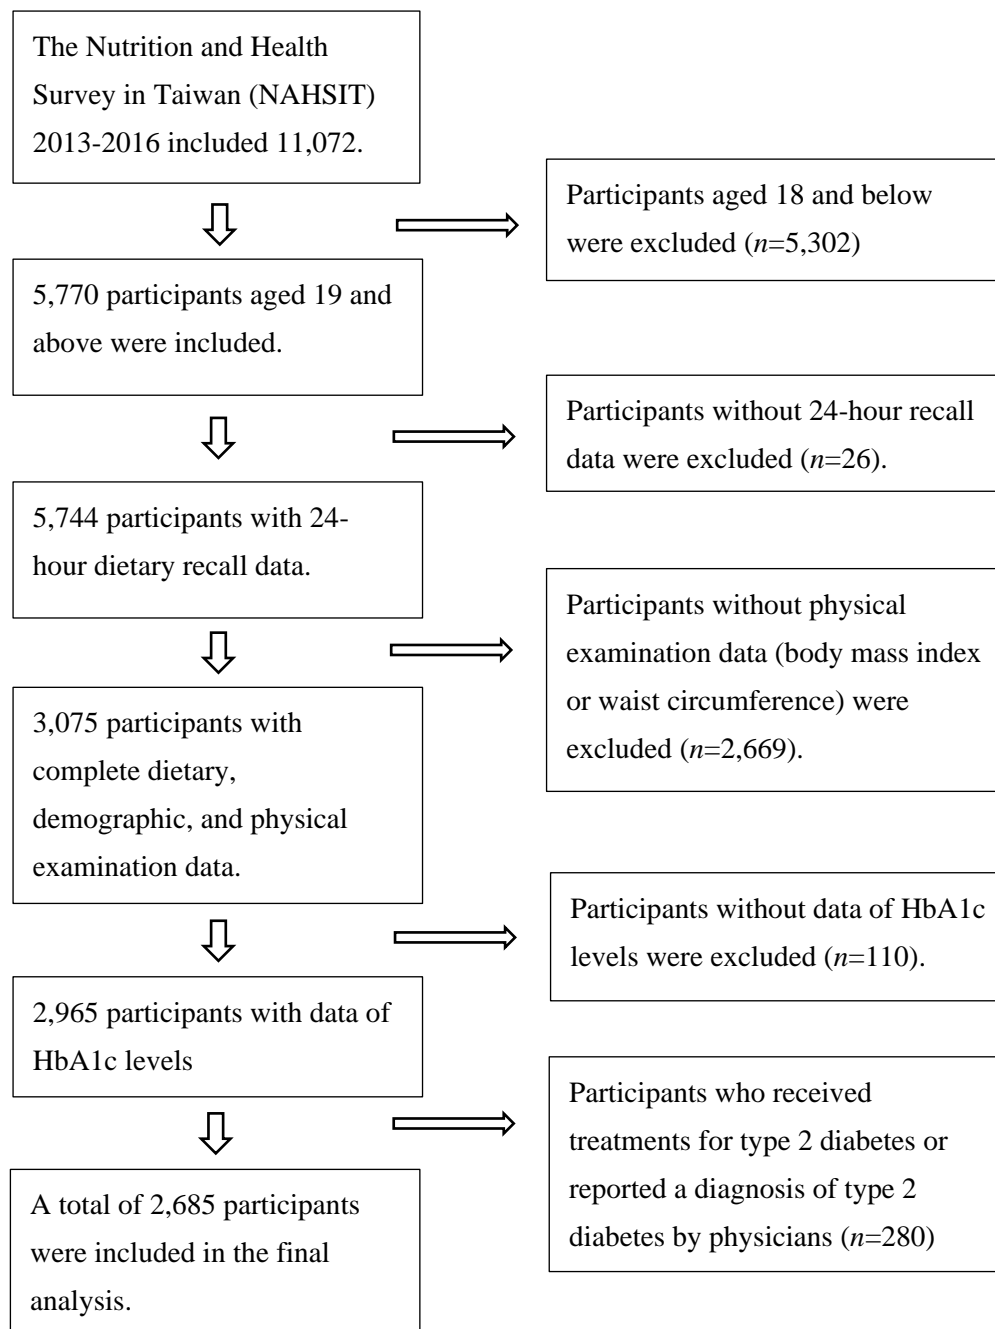

Figure S1. Diagram of the sample selection process for this study ( $n=2,685$ ).
